# Supplementary material for: Circulating miRNA-451a and miRNA-328-3p as Potential Markers of Coronary Artery Aneurysmal Disease
Source: MDPI journal article supplement (doi:10.3390/ijms24065817), 2023-03-18
Supplement: s1 [file s1]

**Table S1.** Genes regulated by hsa-miR-23a-3p

| <b>Gene symbol</b> | <b>Interpretation</b>                                                                                                             |
|--------------------|-----------------------------------------------------------------------------------------------------------------------------------|
| <b>TSC1</b>        | Homo sapiens TSC complex subunit 1 (TSC1), transcript variant 1,mRNA.                                                             |
| <b>BRWD1</b>       | Homo sapiens bromodomain and WD repeat domain containing 1 (BRWD1),transcript variant 3, mRNA.                                    |
| <b>TMEM64</b>      | Homo sapiens transmembrane protein 64 (TMEM64), transcript variant1, mRNA.                                                        |
| <b>DNAJC21</b>     | Homo sapiens DnaJ heat shock protein family (Hsp40) member C21(DNAJC21), transcript variant 2, mRNA.                              |
| <b>ATAT1</b>       | Homo sapiens alpha tubulin acetyltransferase 1 (ATAT1), transcript variant 1, mRNA.                                               |
| <b>TPM3</b>        | Homo sapiens tropomyosin 3 (TPM3), transcript variant Tpm3.2, mRNA.                                                               |
| <b>ZNF275</b>      | Homo sapiens zinc finger protein 275 (ZNF275), transcript variant2, mRNA.                                                         |
| <b>PLAG1</b>       | Homo sapiens PLAG1 zinc finger (PLAG1), transcript variant 2, mRNA.                                                               |
| <b>FSD1L</b>       | Homo sapiens fibronectin type III and SPRY domain containing 1 like(FSD1L), transcript variant 3, mRNA.                           |
| <b>SLC6A15</b>     | Homo sapiens solute carrier family 6 member 15 (SLC6A15),transcript variant 3, mRNA.                                              |
| <b>ZNF268</b>      | Homo sapiens zinc finger protein 268 (ZNF268), transcript variant2, mRNA.                                                         |
| <b>ZNF701</b>      | Homo sapiens zinc finger protein 701 (ZNF701), transcript variant1, mRNA.                                                         |
| <b>GGA3</b>        | Homo sapiens Golgi associated, gamma adaptin ear containing, ARF binding protein 3 (GGA3), transcript variant 1, mRNA.            |
| <b>CD302</b>       | Homo sapiens CD302 molecule (CD302), transcript variant 2, mRNA.                                                                  |
| <b>SEMA6D</b>      | Homo sapiens semaphoring 6D (SEMA6D), transcript variant 7, mRNA.                                                                 |
| <b>PIK3R1</b>      | Homo sapiens phosphoinositide-3-kinase regulatory subunit 1(PIK3R1), transcript variant 4, mRNA.                                  |
| <b>MYH10</b>       | Homo sapiens myosin heavy chain 10 (MYH10), transcript variant 1,mRNA.                                                            |
| <b>GLS</b>         | Homo sapiens glutaminase (GLS), transcript variant 2, mRNA; nuclear gene for mitochondrial product.                               |
| <b>SDHD</b>        | Homo sapiens succinate dehydrogenase complex subunit D (SDHD),transcript variant 2, mRNA; nuclear gene for mitochondrial product. |
| <b>GRTF1</b>       | Homo sapiens growth hormone regulated TBC protein 1 (GRTF1),transcript variant 2, mRNA.                                           |
| <b>MEM170A</b>     | Homo sapiens transmembrane protein 170A (TMEM170A), transcript variant 2, mRNA.                                                   |
| <b>ST7L</b>        | Homo sapiens suppression of tumorigenicity 7 like (ST7L),transcript variant 7, mRNA.                                              |
| <b>MMGT1</b>       | Homo sapiens membrane magnesium transporter 1 (MMGT1), transcript variant 2, mRNA.                                                |
| <b>PPARGC1A</b>    | Homo sapiens PPARG coactivator 1 alpha (PPARGC1A), transcript variant 1, mRNA.                                                    |
| <b>MGAT5</b>       | Homo sapiens alpha-1,6-mannosylglycoprotein6-beta-N-acetylglucosaminyltransferase (MGAT5), transcript variant                     |
| <b>FOXO3</b>       | Homo sapiens forkhead box O3 (FOXO3), transcript variant 1, mRNA.                                                                 |
| <b>FUT4</b>        | Homo sapiens fucosyltransferase 4 (FUT4), mRNA.                                                                                   |
| <b>SOCS6</b>       | Homo sapiens suppressor of cytokine signaling 6 (SOCS6), mRNA.                                                                    |
| <b>TERF2</b>       | Homo sapiens telomeric repeat binding factor 2 (TERF2), mRNA.                                                                     |
| <b>UQCRCF1</b>     | Homo sapiens ubiquinol-cytochrome c reductase, Rieske iron-sulfur polypeptide 1 (UQCRCF1), mRNA; nuclear gene for mitochondrial   |
| <b>LMAN2</b>       | Homo sapiens lectin, mannose binding 2 (LMAN2), mRNA.                                                                             |
| <b>RNF38</b>       | Homo sapiens ring finger protein 38 (RNF38), transcript variant 1,mRNA.                                                           |

|                |                                                                                        |
|----------------|----------------------------------------------------------------------------------------|
| <b>DYNLL2</b>  | Homo sapiens dynein light chain LC8-type 2 (DYNLL2), mRNA.                             |
| <b>STT3B</b>   | Homo sapiens STT3 oligosaccharyltransferase complex catalytic subunit B (STT3B), mRNA. |
| <b>SPTY2D1</b> | Homo sapiens SPT2 chromatin protein domain containing 1 (SPTY2D1),mRNA.                |

**Table S2.** Genes regulated by hsa-miR-210-3p

| <b>Gene symbol</b> | <b>Interpretation</b>                                                                                         |
|--------------------|---------------------------------------------------------------------------------------------------------------|
| <b>RPL22</b>       | Homo sapiens ribosomal protein L22 (RPL22), mRNA.                                                             |
| <b>MITF</b>        | Homo sapiens melanocyte inducing transcription factor (MITF),transcript variant 4, mRNA.                      |
| <b>FGFRL1</b>      | Homo sapiens fibroblast growth factor receptor like 1 (FGFRL1),transcript variant 1, mRNA.                    |
| <b>GTDC1</b>       | Homo sapiens glycosyltransferase like domain containing 1 (GTDC1),transcript variant 1, mRNA.                 |
| <b>U2AF2</b>       | Homo sapiens U2 small nuclear RNA auxiliary factor 2 (U2AF2),transcript variant 2, mRNA.                      |
| <b>SEH1L</b>       | Homo sapiens SEH1 like nucleoporin (SEH1L), transcript variant 1,mRNA.                                        |
| <b>SCN1B</b>       | Homo sapiens sodium voltage-gated channel beta subunit 1 (SCN1B),transcript variant a, mRNA.                  |
| <b>HMGCS1</b>      | Homo sapiens 3-hydroxy-3-methylglutaryl-CoA synthase 1 (HMGCS1),transcript variant 1, mRNA.                   |
| <b>FOXP3</b>       | Homo sapiens forkhead box P3 (FOXP3), transcript variant 2, mRNA.                                             |
| <b>CBX1</b>        | Homo sapiens chromobox 1 (CBX1), transcript variant 2, mRNA.                                                  |
| <b>TFRC</b>        | Homo sapiens transferrin receptor (TFRC), transcript variant 2,mRNA.                                          |
| <b>DDAH1</b>       | Homo sapiens dimethylarginine dimethylaminohydrolase 1 (DDAH1),transcript variant 2, mRNA.                    |
| <b>GIT2</b>        | Homo sapiens GIT ArfGAP 2 (GIT2), transcript variant 6, mRNA.                                                 |
| <b>ATG7</b>        | Homo sapiens autophagy related 7 (ATG7), transcript variant 2,mRNA.                                           |
| <b>RCC2</b>        | Homo sapiens regulator of chromosome condensation 2 (RCC2),transcript variant 2, mRNA.                        |
| <b>VAMP4</b>       | Homo sapiens vesicle associated membrane protein 4 (VAMP4),transcript variant 2, mRNA.                        |
| <b>RUNX1T1</b>     | Homo sapiens RUNX1 partner transcriptional co-repressor 1(RUNX1T1), transcript variant 5, mRNA.               |
| <b>NFIC</b>        | Homo sapiens nuclear factor I C (NFIC), transcript variant 1, mRNA.                                           |
| <b>TP53I11</b>     | Homo sapiens tumor protein p53 inducible protein 11 (TP53I11),transcript variant 1, mRNA.                     |
| <b>ERP27</b>       | Homo sapiens endoplasmic reticulum protein 27 (ERP27), transcript variant 2, mRNA.                            |
| <b>ZNF618</b>      | Homo sapiens zinc finger protein 618 (ZNF618), transcript variant2, mRNA.                                     |
| <b>VMP1</b>        | Homo sapiens vacuole membrane protein 1 (VMP1), transcript variant2, mRNA.                                    |
| <b>MRE11</b>       | Homo sapiens MRE11 homolog, double strand break repair nuclease(MRE11), transcript variant 3, mRNA.           |
| <b>DIMT1</b>       | Homo sapiens DIMT1 rRNA methyltransferase and ribosome maturation factor (DIMT1), transcript variant 2, mRNA. |
| <b>CNTNAP5</b>     | Homo sapiens contactin associated protein family member 5(CNTNAP5), transcript variant 3, mRNA.               |
| <b>KCNJ6</b>       | Homo sapiens potassium inwardly rectifying channel subfamily Jmember 6 (KCNJ6), mRNA.                         |

|                |                                                                                                                |
|----------------|----------------------------------------------------------------------------------------------------------------|
| <b>NPTX1</b>   | Homo sapiens neuronal pentraxin 1 (NPTX1), mRNA.                                                               |
| <b>DYRK2</b>   | Homo sapiens dual specificity tyrosine phosphorylation regulated kinase 2 (DYRK2), transcript variant 1, mRNA. |
| <b>HOXA1</b>   | Homo sapiens homeobox A1 (HOXA1), transcript variant 1, mRNA.                                                  |
| <b>ACTR1A</b>  | Homo sapiens actin related protein 1A (ACTR1A), mRNA.                                                          |
| <b>PKIA</b>    | Homo sapiens cAMP-dependent protein kinase inhibitor alpha (PKIA),transcript variant 1, mRNA.                  |
| <b>UBQLN1</b>  | Homo sapiens ubiquilin 1 (UBQLN1), transcript variant 1, mRNA.                                                 |
| <b>EHD2</b>    | Homo sapiens EH domain containing 2 (EHD2), mRNA.                                                              |
| <b>SERTAD2</b> | Homo sapiens SERTA domain containing 2 (SERTAD2), mRNA.                                                        |
| <b>HECTD1</b>  | Homo sapiens HECT domain E3 ubiquitin protein ligase 1 (HECTD1),mRNA.                                          |
| <b>MNT</b>     | Homo sapiens MAX network transcriptional repressor (MNT), mRNA.                                                |
| <b>HIF3A</b>   | Homo sapiens hypoxia inducible factor 3 subunit alpha (HIF3A),transcript variant 2, mRNA.                      |

**Table S3.** Genes regulated by hsa-miR-328-3p

| <b>Gene symbol</b> | <b>Interpretation</b>                                                                                                                |
|--------------------|--------------------------------------------------------------------------------------------------------------------------------------|
| <b>HNRNPL</b>      | Homo sapiens heterogeneous nuclear ribonucleoprotein L (HNRNPL),transcript variant 2, mRNA.                                          |
| <b>NDUFV3</b>      | Homo sapiens NADH: ubiquinone oxidoreductase subunit V3 (NDUFV3),transcript variant 2, mRNA; nuclear gene for mitochondrial product. |
| <b>SKA1</b>        | Homo sapiens spindle and kinetochore associated complex subunit 1(SKA1), transcript variant 1, mRNA.                                 |
| <b>UBTF</b>        | Homo sapiens upstream binding transcription factor (UBTF),transcript variant 2, mRNA.                                                |
| <b>PTPRJ</b>       | Homo sapiens protein tyrosine phosphatase receptor type J (PTPRJ),transcript variant 2, mRNA.                                        |
| <b>EZR</b>         | Homo sapiens ezrin (EZR), transcript variant 2, mRNA.                                                                                |
| <b>ARHGEF25</b>    | Homo sapiens Rho guanine nucleotide exchange factor 25 (ARHGEF25),transcript variant 3, mRNA.                                        |
| <b>SZRD1</b>       | Homo sapiens SUZ RNA binding domain containing 1 (SZRD1),transcript variant 1, mRNA.                                                 |
| <b>ORMDL1</b>      | Homo sapiens ORMDL sphingolipid biosynthesis regulator 1 (ORMDL1),transcript variant 2, mRNA.                                        |
| <b>MAP4</b>        | Homo sapiens microtubule associated protein 4 (MAP4), transcript variant 4, mRNA.                                                    |
| <b>OTUD5</b>       | Homo sapiens OTU deubiquitinase 5 (OTUD5), transcript variant 2,mRNA.                                                                |
| <b>ETV3</b>        | Homo sapiens ETS variant transcription factor 3 (ETV3), transcript variant 1, mRNA.                                                  |
| <b>FKBP5</b>       | Homo sapiens FKBP prolyl isomerase 5 (FKBP5), transcript variant 2,mRNA.                                                             |
| <b>MKI67</b>       | Homo sapiens marker of proliferation Ki-67 (MKI67), transcript variant 2, mRNA.                                                      |
| <b>TYW3</b>        | Homo sapiens tRNA-yW synthesizing protein 3 homolog (TYW3),transcript variant 2, mRNA.                                               |
| <b>HSDL2</b>       | Homo sapiens hydroxysteroid dehydrogenase like 2 (HSDL2),transcript variant 2, mRNA.                                                 |
| <b>BACE1</b>       | Homo sapiens beta-secretase 1 (BACE1), transcript variant e, mRNA.                                                                   |
| <b>SNX12</b>       | Homo sapiens sorting nexin 12 (SNX12), transcript variant 1, mRNA.                                                                   |
| <b>POM121</b>      | Homo sapiens POM121 transmembrane nucleoporin (POM121), transcript variant 1, mRNA.                                                  |

|                 |                                                                                                              |
|-----------------|--------------------------------------------------------------------------------------------------------------|
| <b>STT3A</b>    | Homo sapiens STT3 oligosaccharyltransferase complex catalytic subunit A (STT3A), transcript variant 1, mRNA. |
| <b>SMC1A</b>    | Homo sapiens structural maintenance of chromosomes 1A (SMC1A), transcript variant 2, mRNA.                   |
| <b>RALGAPB</b>  | Homo sapiens Ral GTPase activating protein non-catalytic subunit beta (RALGAPB), transcript variant 2, mRNA. |
| <b>TMEM132B</b> | Homo sapiens transmembrane protein 132B (TMEM132B), transcript variant 2, mRNA.                              |
| <b>CBX6</b>     | Homo sapiens chromobox 6 (CBX6), transcript variant 2, mRNA.                                                 |
| <b>HMGB1</b>    | Homo sapiens high mobility group box 1 (HMGB1), transcript variant 3, mRNA.                                  |
| <b>AGO1</b>     | Homo sapiens argonaute RISC component 1 (AGO1), transcript variant 1, mRNA.                                  |
| <b>KCNK6</b>    | Homo sapiens potassium two pore domain channel subfamily K member 6 (KCNK6), mRNA.                           |
| <b>SCD</b>      | Homo sapiens stearoyl-CoA desaturase (SCD), mRNA.                                                            |
| <b>LPCAT3</b>   | Homo sapiens lysophosphatidylcholine acyltransferase 3 (LPCAT3), mRNA.                                       |
| <b>TMOD3</b>    | Homo sapiens tropomodulin 3 (TMOD3), mRNA.                                                                   |
| <b>TMEM33</b>   | Homo sapiens transmembrane protein 33 (TMEM33), mRNA.                                                        |

**Table S4.** Genes regulated by hsa-miR-425-3p

| <b>Gene symbol</b> | <b>Interpretation</b>                                                                                         |
|--------------------|---------------------------------------------------------------------------------------------------------------|
| <b>VAV3</b>        | Homo sapiens vav guanine nucleotide exchange factor 3 (VAV3), transcript variant 2, mRNA.                     |
| <b>MECP2</b>       | Homo sapiens methyl-CpG binding protein 2 (MECP2), transcript variant 2, mRNA.                                |
| <b>ISLR2</b>       | Homo sapiens immunoglobulin superfamily containing leucine rich repeat 2 (ISLR2), transcript variant 1, mRNA. |
| <b>GABPB2</b>      | Homo sapiens GA binding protein transcription factor subunit beta 2 (GABPB2), transcript variant 3, mRNA.     |
| <b>RAC1</b>        | Homo sapiens Rac family small GTPase 1 (RAC1), transcript variant Rac1, mRNA.                                 |
| <b>SH3RF2</b>      | Homo sapiens SH3 domain containing ring finger 2 (SH3RF2), mRNA.                                              |

**Table S5.** Genes regulated by hsa-miR-451a

| <b>Gene symbol</b>       | <b>Interpretation</b>                                                  |
|--------------------------|------------------------------------------------------------------------|
| <b>hsa-miR-451a</b> IL6R | Homo sapiens interleukin 6 receptor (IL6R), transcript variant 1, mRNA |
